# Supplementary material for: Engineering PEG10-assembled endogenous virus-like particles with genetically encoded neoantigen peptides for cancer vaccination
Source: eLife journal article supplement (doi:10.7554/elife.98579), 2024-06-20
Supplement: fig1-data2 [file elife-98579-fig1-data2-v1.pdf]

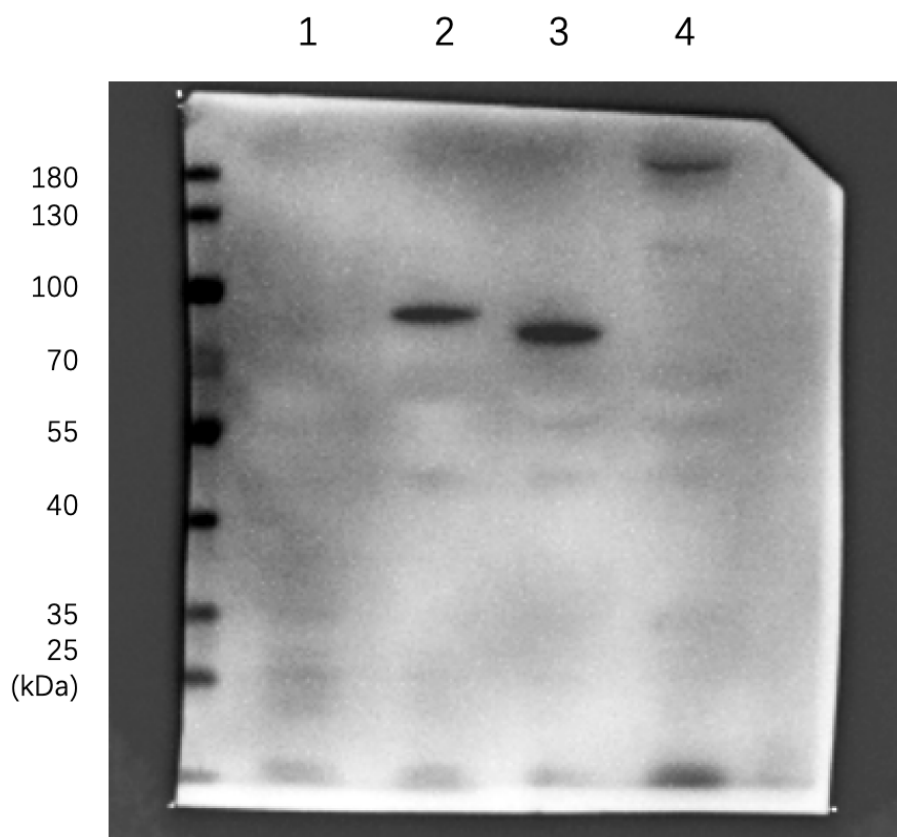

IB: HA tag

- |                       |                          |
|-----------------------|--------------------------|
| 1. eGFP + VSVg        | 2. gag-/-eGFP + VSVg     |
| 3. gag-GS-eGFP + VSVg | 4. gag-/-pol-eGFP + VSVg |

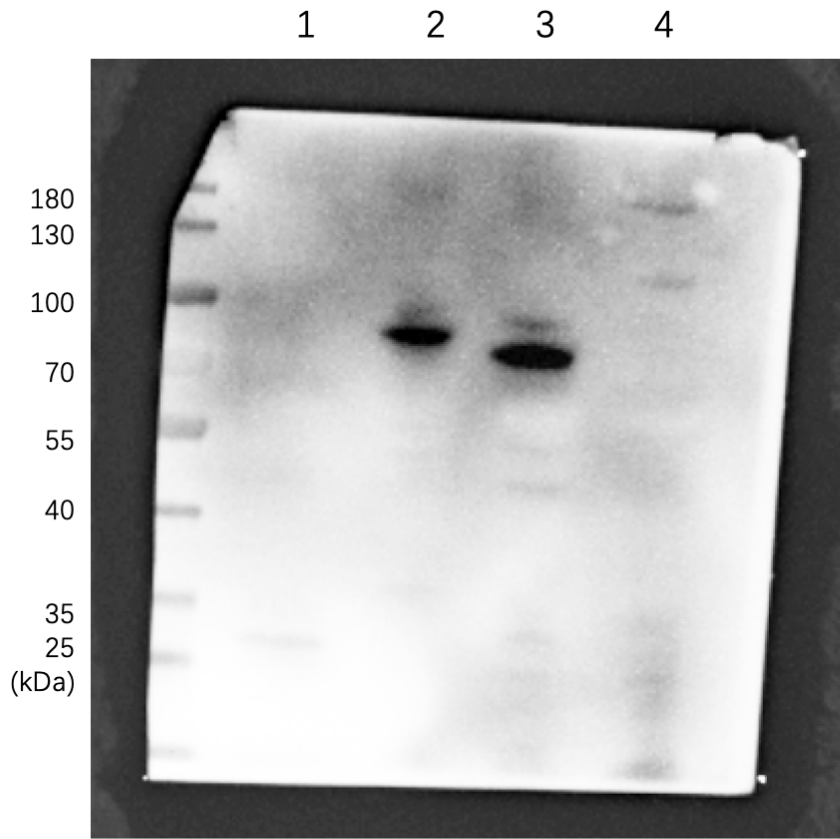

IB: eGFP

- |                       |                          |
|-----------------------|--------------------------|
| 1. eGFP + VSVg        | 2. gag-/-eGFP + VSVg     |
| 3. gag-GS-eGFP + VSVg | 4. gag-/-pol-eGFP + VSVg |
