# Supplementary material for: Engineering PEG10-assembled endogenous virus-like particles with genetically encoded neoantigen peptides for cancer vaccination
Source: eLife journal article supplement (doi:10.7554/elife.98579), 2024-06-20

cell lysate  
supernatant  
supernatant after  
ultracentrifugation

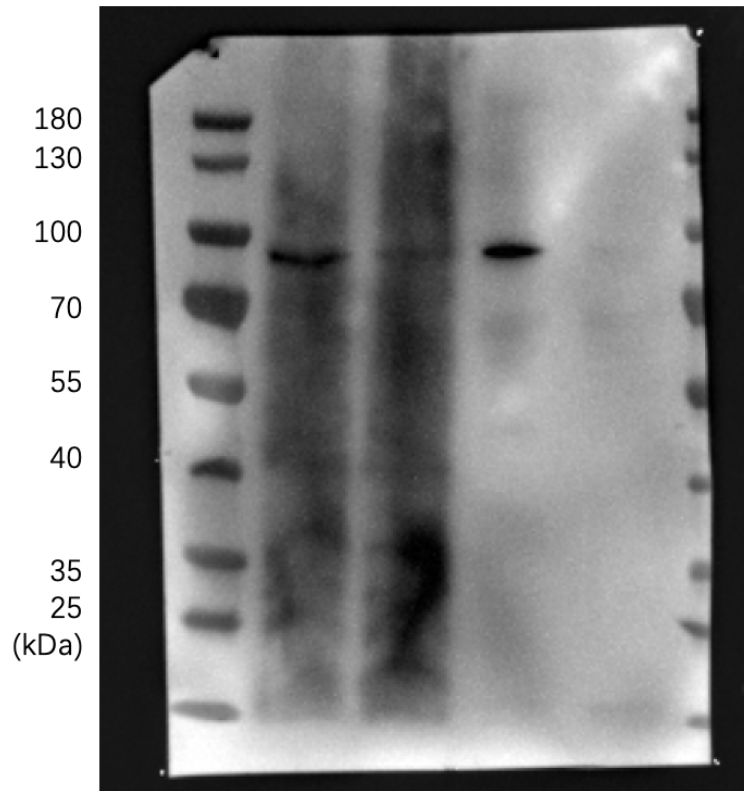

IB: HA tag

cell lysate  
supernatant  
supernatant after  
ultracentrifugation

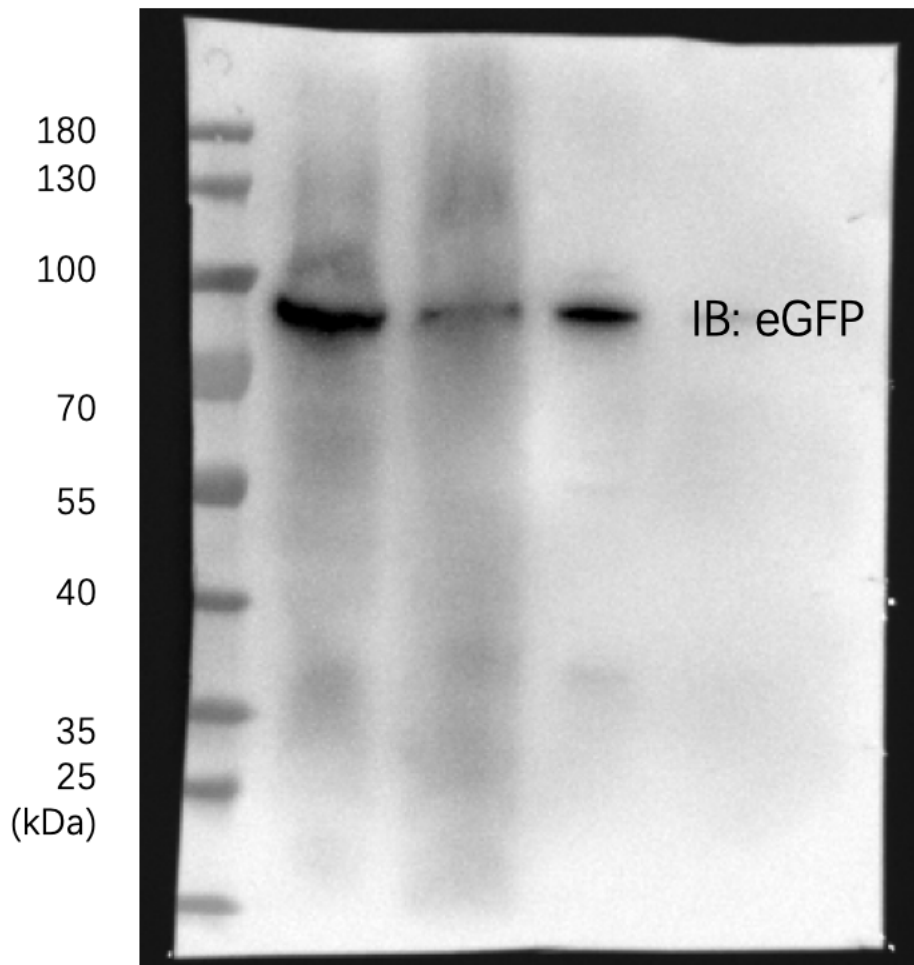

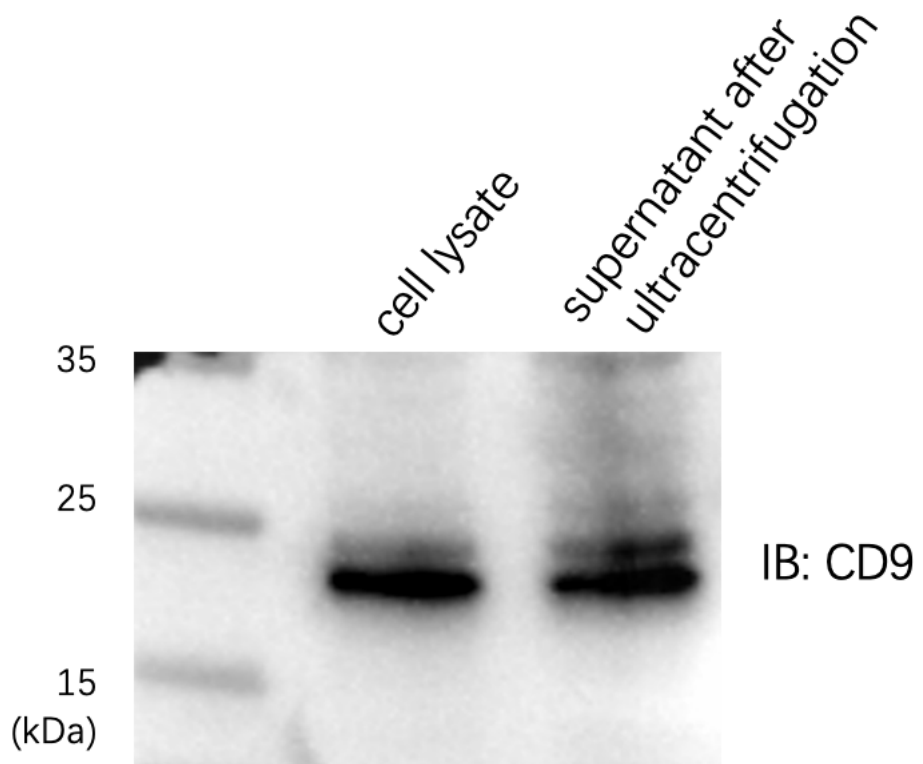

Supplement: fig1-figsupp1-data1 [file elife-98579-fig1-figsupp1-data1-v1.pdf]
