# Supplementary material for: Engineering PEG10-assembled endogenous virus-like particles with genetically encoded neoantigen peptides for cancer vaccination
Source: eLife journal article supplement (doi:10.7554/elife.98579), 2024-06-20

|      |   |     |   |           |
|------|---|-----|---|-----------|
| eVLP | + | +   | + | +         |
| DBCO | 0 | 3.5 | 7 | 14 (nmol) |
| CpG  | + | +   | + | +         |

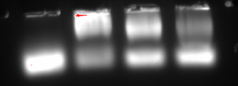

Supplement: fig2-data2 [file elife-98579-fig2-data2-v1.pdf]
