# Supplementary material for: Engineering PEG10-assembled endogenous virus-like particles with genetically encoded neoantigen peptides for cancer vaccination
Source: eLife journal article supplement (doi:10.7554/elife.98579), 2024-06-20

|      |   |     |     |     |   |
|------|---|-----|-----|-----|---|
| eVLP | + | +   | +   | +   | + |
| DBCO | 0 | 0.7 | 2.1 | 3.5 | 7 |
| CpG  | + | +   | +   | +   | + |

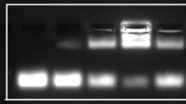

Supplement: fig2-figsupp2-data1 [file elife-98579-fig2-figsupp2-data1-v1.pdf]
