# Supplementary material for: Engineering PEG10-assembled endogenous virus-like particles with genetically encoded neoantigen peptides for cancer vaccination
Source: eLife journal article supplement (doi:10.7554/elife.98579), 2024-06-20

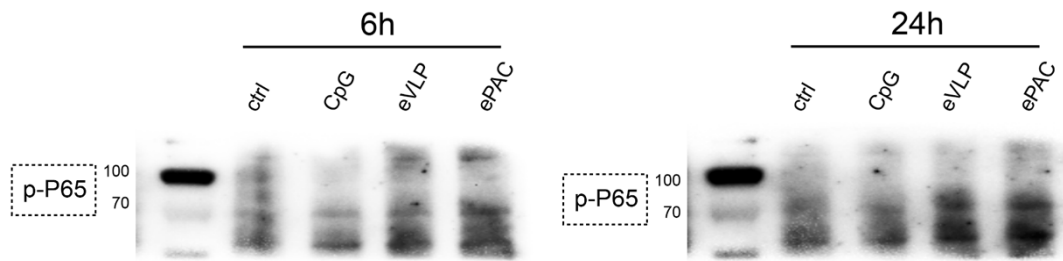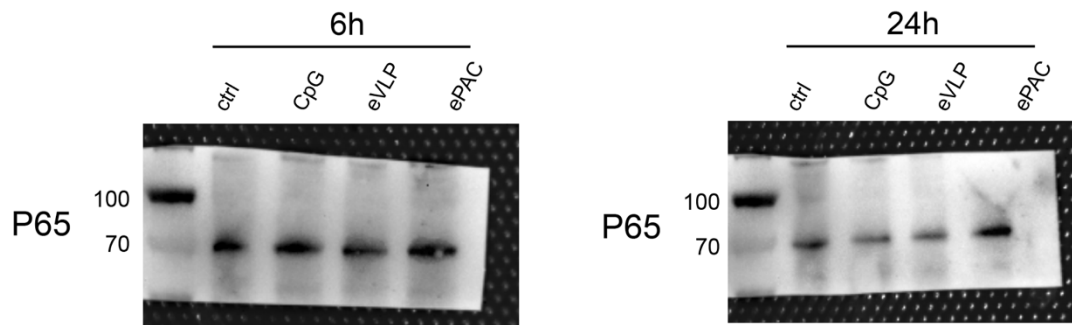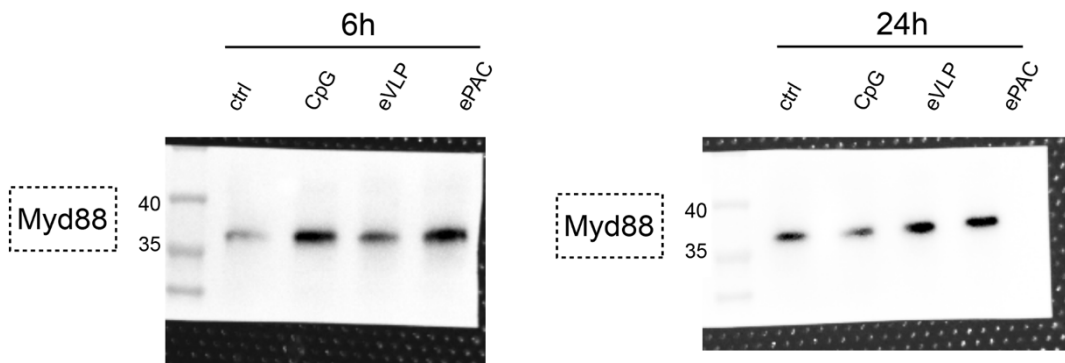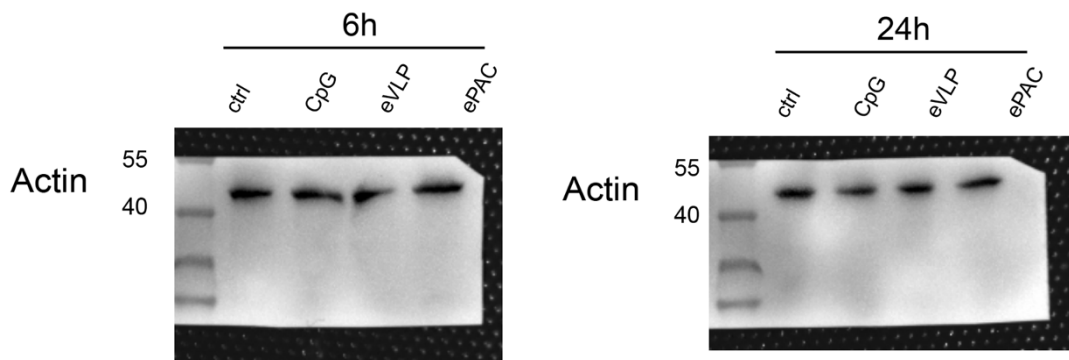

Supplement: fig3-data2 [file elife-98579-fig3-data2-v1.pdf]
