# Supplementary material for: Engineering PEG10-assembled endogenous virus-like particles with genetically encoded neoantigen peptides for cancer vaccination
Source: eLife. 2024 Sep 13;13:RP98579. doi: 10.7554/eLife.98579 (PMC11398863; doi:10.7554/eLife.98579)
Supplement: Figure 1—source data 1. [file elife-98579-fig1-data1.xlsx]

## Sheet: Figure 1
﻿Figure 1F
	gag-pol vs gag-eGFP vs VSVg (μg)			0 vs 0 vs 0	0 vs 16 vs 3	1 vs 15 vs 3	2 vs 14 vs 3	4 vs 12 vs 3	8 vs 8 vs 3	10 vs 0 vs 3
				0.12	76	63.1	78.3	59.6	40.4	0.19
				0.16	79.5	63.6	79.7	58.2	35.2	0.062
				0.067	80.9	67.2	79.4	56.6	28.3	0.1
Figure 1H
	ctrl	gag-pol	gag-pol
		gag-eGFP	gag-eGFP
			VSVg
	0.12	16	73.5
	0.16	12.4	79.1
	0.067	18.1	72.4
