# Supplementary material for: Engineering PEG10-assembled endogenous virus-like particles with genetically encoded neoantigen peptides for cancer vaccination
Source: eLife. 2024 Sep 13;13:RP98579. doi: 10.7554/eLife.98579 (PMC11398863; doi:10.7554/eLife.98579)
Supplement: Figure 2—source data 1. [file elife-98579-fig2-data1.xlsx]

## Sheet: Figure 2
Figure 2E
	CHO			CHO: DEC-205
	eVLP	eVLP +	ePAC	ePAC
		CpG
	7.79	5.1	31.4	43.1
	3.03	6.03	26.2	35.7
	2.49	4.76	29.4	40.3
