# Supplementary material for: Engineering PEG10-assembled endogenous virus-like particles with genetically encoded neoantigen peptides for cancer vaccination
Source: eLife. 2024 Sep 13;13:RP98579. doi: 10.7554/eLife.98579 (PMC11398863; doi:10.7554/eLife.98579)
Supplement: Figure 3—source data 1. [file elife-98579-fig3-data1.xlsx]

## Sheet: Figure 3
Figure 3C
	eVLP	eVLP +	ePAC
		CpG
	0.21	18.7	99.9
	0.13	15.2	99.9
	0.08	19.6	99.9
Figure 3D
	eVLP	eVLP +	ePAC
		CpG
	0.61	23.9	40.6
	0.23	23.1	42.2
	0.43	21.9	43.4
Figure 3E
	IL-6		6h			24h
	ctrl	0	0	0	0	0	0
	CpG	10.434	12.173	10.434	34.782	33.043	33.043
	eVLP	0	0	0	3.478	6.956	1.739
	ePAC	27.826	20.869	26.086	104.347	97.391	90.434
	IL-12p70		6h			24h
	ctrl	0	0	0	0	0	0
	CpG	0	0	0	20.869	10.434	17.391
	eVLP	0	0	0	6.956	3.478	6.956
	ePAC	24.347	26.086	27.826	66.086	80.01	78.26
Figure 3H
	ctrl	CpG	eVLP	ePAC
	9.38	19.9	12.72	23.7
	8.7	17.62	15.33	24.51
	8.23	20.2	14.69	24.02
Figure 3I
	ctrl	CpG	eVLP	ePAC	Peptides + CpG
	14.6	31.67	39.53	55.73	60.8
	16.27	32.53	39.33	58.4	60.67
	16.27	36.33	39.6	59.07	59.8
