# Supplementary material for: Engineering PEG10-assembled endogenous virus-like particles with genetically encoded neoantigen peptides for cancer vaccination
Source: eLife. 2024 Sep 13;13:RP98579. doi: 10.7554/eLife.98579 (PMC11398863; doi:10.7554/eLife.98579)
Supplement: Figure 4—source data 1. [file elife-98579-fig4-data1.xlsx]

## Sheet: Figure 4
Figure 4C
	PBS	Dil	Dil +	Dil +
			eVLP	ePAC
	0	12.9	160.9	178.1
	0	12	132.4	120.2
	0	29.9	99.4	142.9
	0	23.5	60.3	95.2
	0	22.1	17.7	100.8
	0	58.9	48.1	81.9
Figure 4E﻿
	Dil	Dil +	Dil +
		eVLP	ePAC
	8.22	10.3	12.5
	4.99	9.68	11.9
	7.83	7.89	13.3
Figure 4H
	ctrl	CpG	eVLP	ePAC
	49.1	58.9	53.3	63
	41.8	56.1	49.4	62.6
	37.7	58	42.2	60.5
Figure 4J
	ctrl	CpG	eVLP	ePAC
	12.6	19.3	16.4	24.7
	9.37	23.5	18.1	24.4
	8.6	18.4	16.7	25.2
Figure 4L
	ctrl	CpG	eVLP	ePAC
	8	22	47	149
	9	25	82	182
	10	41	93	137
