# Supplementary material for: Engineering PEG10-assembled endogenous virus-like particles with genetically encoded neoantigen peptides for cancer vaccination
Source: eLife. 2024 Sep 13;13:RP98579. doi: 10.7554/eLife.98579 (PMC11398863; doi:10.7554/eLife.98579)
Supplement: Figure 5—source data 1. [file elife-98579-fig5-data1.xlsx]

## Sheet: Figure 5
Figure 5B﻿
				PBS						CpG						eVLP						eVLP + CpG						ePAC
	0	61.06	75.71	61.06	95.65	56.7	82.47	89.24	57.99	61.06	63.75	70	63.63	89.24	66.82	63.36	73.75	58.82	73.01	73.23	58.19	68.43	51.3	63.63	65.66	73.01	71.53	82.87	73.01	50.34	58.08
	2	75.71	97.47	82.87	142.88	88.94	127.8	124.65	109.55	79.77	75.71	81.46	87.73	132.96	114.38	85.67	105.59	94.22	89.38	106.43	89.89	98.31	82.47	127.01	76.25	102.6	94.22	107.65	99.24	69.63	74.88
	4	109.33	134.95	119.07	219.28	136.46	191.9	164.15	136.24	92.26	86.02	115.35	107.91	153.6	159.74	114.38	149.99	122.4	133.12	157.58	136.93	119.42	127.06	184	112.09	145.76	121.09	136.46	127.01	87.88	88.43
	6	142.2	148.84	154.21	276.82	180.34	222.91	231.04	182.27	114.38	95.65	113.13	225.26	203.35	188.54	143.36	196.6	121.1	181.48	214.33	161.6	137.68	199.12	237.16	188.06	166.64	181.3	156.33	176.4	93.64	99.72
	8	195.2	247.5	246.4	327.23	194.35	369.8	265.24	210.39	138.38	116.06	102.69	236.82	310.01	144.65	259	206.68	159.53	196.99	234.17	213.16	135.76	274.6	255.53	219.28	152.1	199.12	163.85	249.02	85	93.64
	10	214.24	238.21	310.68	617.4	245.13	490.4	392.09	255.88	257.03	166.46	83.82	230.63	291.96	169.14	367.84	217.73	176.62	225.26	324	282.41	184.05	270.74	243.09	212.7	124.65	282.01	135	310.46	69.86	97.54
	12	343.19	363.1	379.46	726.94	344.45	610.02	391.07	296.23	279.86	222.19	103.52	227.25	299.67	196.46	368.33	364.37	192.24	208.09	311.85	245.48	204.16	262.81	233.93	204.25	149.99	226.15	134.95	254.95	56.45	85.24
	14	400.01	427.73	436.77	785.29	386.02	766.14	407.93	321.51	218.49	270.74	209.95	220.32	274.6	241.97	325.42	328.74	224.26	186.52	215.3	227.81	226.48	235.47	228.15	169.14	143.65	185.9	119.07	233.44	65.81	62.92
	16	617.4	463.74	546.36	827.54	487.35	841	490.91	314.29	217.73	355.2	224.52	224.32	236.25	233.29	321.51	277.72	287.71	199.84	207.94	221.15	206.68	213.75	213.56	144.58	136.46	164.71	117	202.5	55.57	57.33
	18	753.37	540.56	683.16	900	664.85	912.02	540.56	292.78	232.73	377.26	239.06	234.48	221.15	222.91	269	225	317.81	196.99	221.04	232.73	226.48	197.17	191.56	133.1	125.32	151.84	132.96	178.85	53.62	51.2
	20	898.1	603.65	771.46	976.38	772.52	982.34	569.92	259	250.31	400.08	257.03	216.76	204.77	237.14	259.2	210.83	358.96	176.16	234.42	230.69	253.13	186.52	178.85	131.59	94.94	135	148.1	166.46	50.34	52.95
Figure 5E﻿
	PBS	CpG	eVLP	eVLP +	ePAC
				CpG
	9.17	14.6	20	25.8	25.3
	18.71	22.8	13.7	17.4	35.1
	9.59	8.57	9.44	26	34.7
	10.9	15.4	13.8	24.9	29.9
	9.83	15.6	14.5	16.2	32.7
	12.4	16.4	13.9	14.1	31.9
Figure 5G﻿
				CD4			CD8
	PBS		17	18	12	9	18	10
	CpG		35	23	28	41	36	38
	eVLP		36	33	39	56	42	58
	eVLP + CpG		38	27	56	62	58	73
	ePAC		65	73	57	145	128	156
Figure 5I
	PBS	CpG	eVLP	eVLP +	ePAC
				CpG
	7	19.2	9.94	31.3	64.9
	9.27	14.7	9.39	29.2	65.3
	7.26	2.7	7.52	30.7	65.1
	5.5	14	9.37	27.6	33.9
	2.68	6.53	6.89	23.7	42.1
	0.67	6.64	18.4	40.8	41.1
Figure 5K﻿
			PBS			ePAC
	PD-1	7	8	2	19	18	10
	TIM-3	5	7	12	41	56	38
	CTLA-4	3	3	3	5	4	5
