# Supplementary material for: Engineering PEG10-assembled endogenous virus-like particles with genetically encoded neoantigen peptides for cancer vaccination
Source: eLife. 2024 Sep 13;13:RP98579. doi: 10.7554/eLife.98579 (PMC11398863; doi:10.7554/eLife.98579)
Supplement: Figure 6—source data 1. [file elife-98579-fig6-data1.xlsx]

## Sheet: Figure 6
Figure 6B
				PBS						αTIM-3						ePAC						ePAC + αTIM-3
	Day0	2.4	3	2.1	1.9	2.9	2.2	1.6	4	2.7	3	2	2.3	2.4	1	2.9	2.2	2	2.1	2.5	4	2	3	2	2.8
	Day28	48	39	35	0	0	0	1.5	5	2.3	8	0	0	1.3	2.2	13.5	1.2	0	0	1.5	0.9	0	0	0	0
Figure 6G﻿
	PBS	αTIM-3	ePAC	ePAC + αTIM-3
	8.66	12.2	11	11.4
	7.63	12.3	13.4	17.1
	7.86	10.5	12.8	17.4
		11.3	10.7	16.3
		10.4	11	12
		11	9.04	11.9
Figure 6H﻿
	PBS	αTIM-3	ePAC	ePAC + αTIM-3
	35.57	28.57	42.06	58.77
	31.26	34.47	35.32	55.83
	39.76	44.17	45.42	59
		40.68	40.67	61.5
		37.81	37.57	42.68
		41.04	39.91	56.51
Figure 6I﻿
	PBS	αTIM-3	ePAC	ePAC + αTIM-3
	2.07	0.88	3.43	5.12
	1.32	0.94	4.19	10.7
	1.92	0.77	7.81	12.3
		1.21	3.18	5.24
		0.68	3.36	10.6
		0.83	5.04	10.4
