# Supplementary material for: Engineering PEG10-assembled endogenous virus-like particles with genetically encoded neoantigen peptides for cancer vaccination
Source: eLife. 2024 Sep 13;13:RP98579. doi: 10.7554/eLife.98579 (PMC11398863; doi:10.7554/eLife.98579)
Supplement: Figure 7—source data 1. [file elife-98579-fig7-data1.xlsx]

## Sheet: Figure 7
Figure 7B﻿
	ctrl	eVLP	ePAC
	0.35	3.4	14.1
	1.14	11	20.7
	2.65	10.7	24
Figure 7D﻿
			ctrl			eVLP			ePAC
	0h	6.06	7.71	6.06	8.24	5.99	6.06	9.24	6.82	6.36
	24h	7.71	9.47	8.87	9.15	13.24	9.26	13.96	21.38	25.67
	48h	10.33	14.95	11.07	12.65	19.55	19.77	55.6	49.74	31.38
	72h	14.2	18.84	14.21	23.04	28.27	31.38	53.35	58.54	41.36
Figure 7F
				PBS					αTIM-3					αTIM-3 + ePAC
	0 day	40.94	55.59	40.94	75.53	36.58	28.8	51.47	49.99	61.33	51.47	43.4	45.43	37.85	59.83	46.04
	3 day	55.59	77.35	62.75	122.76	68.82	48.09	81.06	72.68	86.11	77.7	106.78	56.02	54.65	95.12	63
	6 day	89.21	114.83	98.95	199.16	116.34	66.34	124.22	99.55	114.92	105.47	163.77	91.86	68.2	134.64	84.83
	9 day	122.08	128.72	134.09	256.7	160.22	72.1	145.1	159.76	134.79	154.86	166.93	137.83	49.49	103.37	83.73
	12 day	175.08	227.38	226.28	307.11	174.23	63.46	130.56	177.58	142.31	227.48	145.3	149.05	0	108.62	0
	15 day	194.12	308.09	290.56	497.28	255.01	88.32	173.11	190.47	153.46	218.92	112.86	122.47	0	88.55	0
Figure 7J﻿
	PBS	αTIM-3	αTIM-3 + ePAC
	8.79	11.5	16.3
	5.94	13.2	19.9
	6.83	11.8	18.3
	10.9	10.8	19.1
	10.8	12.5	16.4
Figure 7K
	PBS	αTIM-3	αTIM-3 + ePAC
	1.94	3.4	15.5
	1.14	7.44	14.5
	1.58	9.71	17.1
	2.18	5.92	18.4
	2.19	9.89	28.8
